# Supplementary material for: Proteogenomic analysis of Inhibitor of Differentiation 4 (ID4) in basal-like breast cancer
Source: PubMed Central journal article supplement (PMC7291584; doi:10.1186/s13058-020-01306-6), 2020-06-11

# Supplementary Figure 1

a

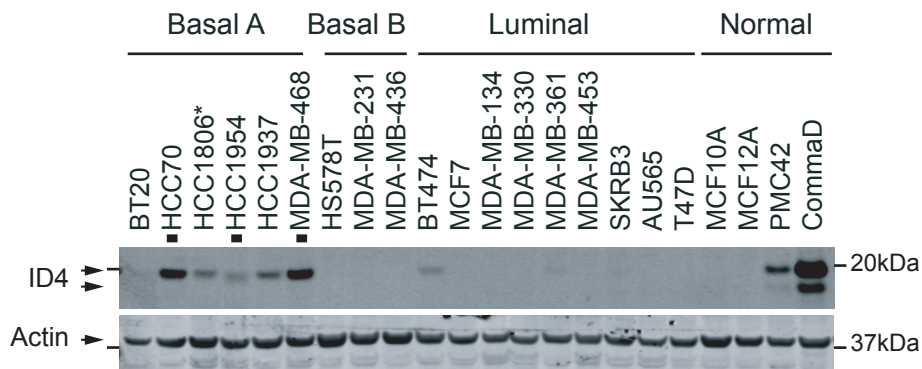

\*not classified

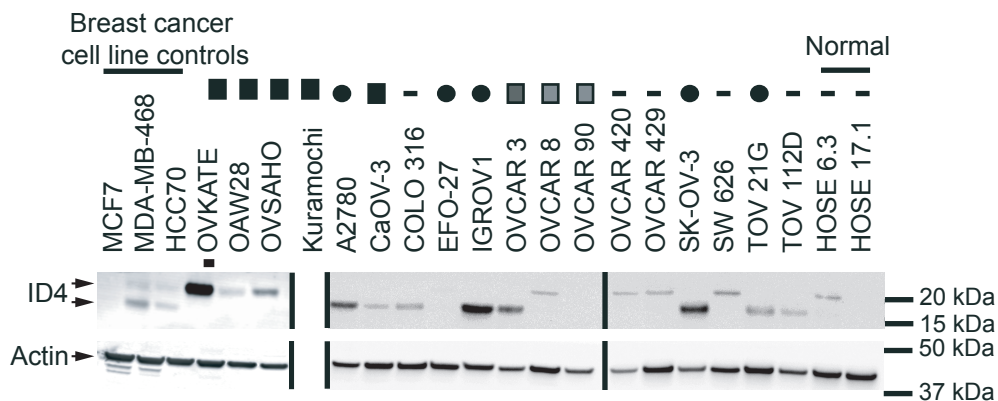

- Not tested
- Unlikely high-grade serous
- Likely high-grade serous
- Possibly high-grade serous (more likely)
- Possibly high-grade serous (less likely)

b

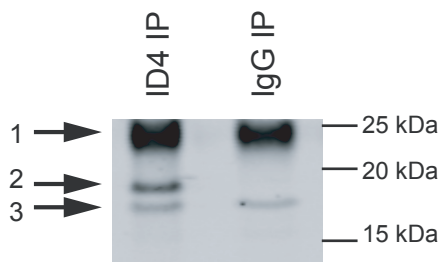

1. IgG light chain
2. ID4
3. Unidentified non-specific band

# Supplementary Figure 2

a

| Cell line | ID4 ChIP replicate | Peaks (after IgG removal) | Consensus peaks | Peaks present in unique genes |
|-----------|--------------------|---------------------------|-----------------|-------------------------------|
| HCC70     | 1                  | 81                        | 46              | 7                             |
|           | 2                  | 63                        |                 |                               |
|           | 3                  | 73                        |                 |                               |

b

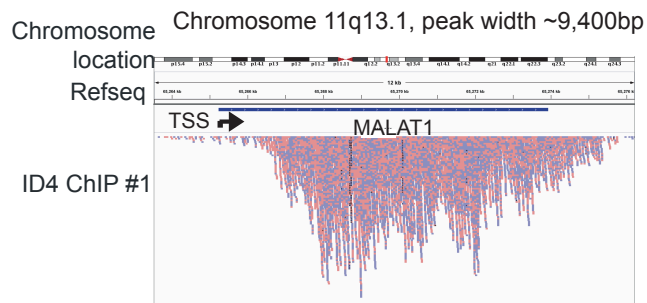

c

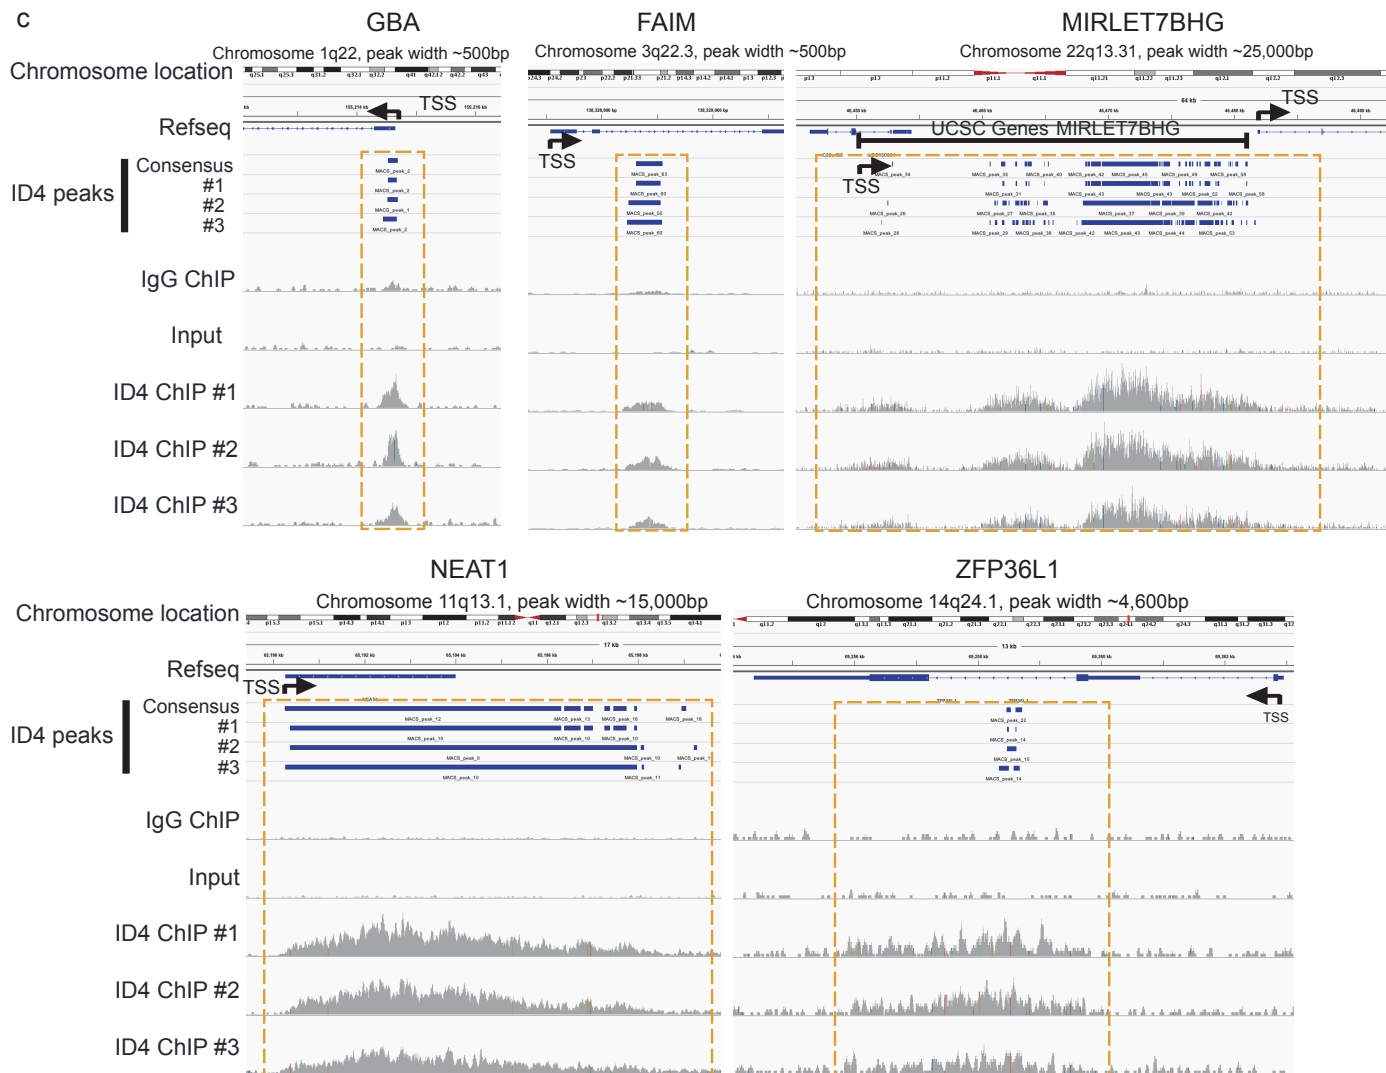

# Supplementary Figure 3

a

| Cell line | ID4 ChIP replicate | Peaks (after IgG removal) | Peaks (Replicate consensus) | Peaks (after IgG and ENCODE removal) | Peaks (present in unique genes) |
|-----------|--------------------|---------------------------|-----------------------------|--------------------------------------|---------------------------------|
| HCC70     | ID4 replicate 1    | 154                       | 76                          | 35                                   | 16                              |
|           | ID4 replicate 2    | 169                       |                             |                                      |                                 |
| HCC1954   | ID4 replicate 1    | 76                        | 40                          | 37                                   | 20                              |
|           | ID4 replicate 2    | 64                        |                             |                                      |                                 |

b

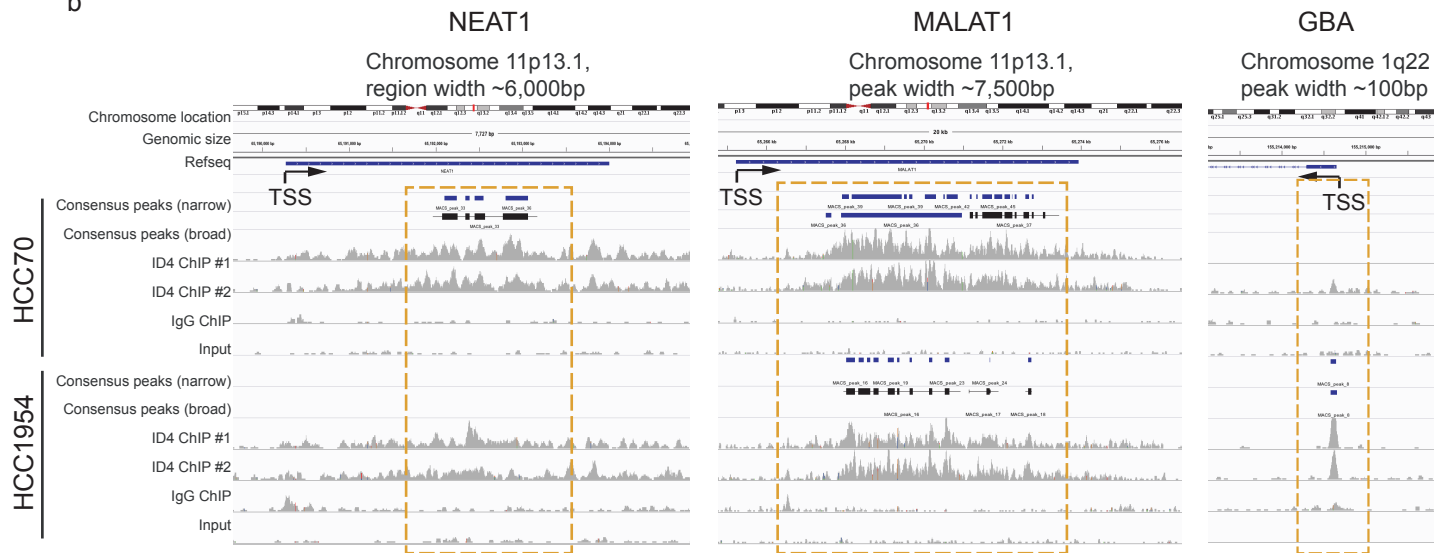

c

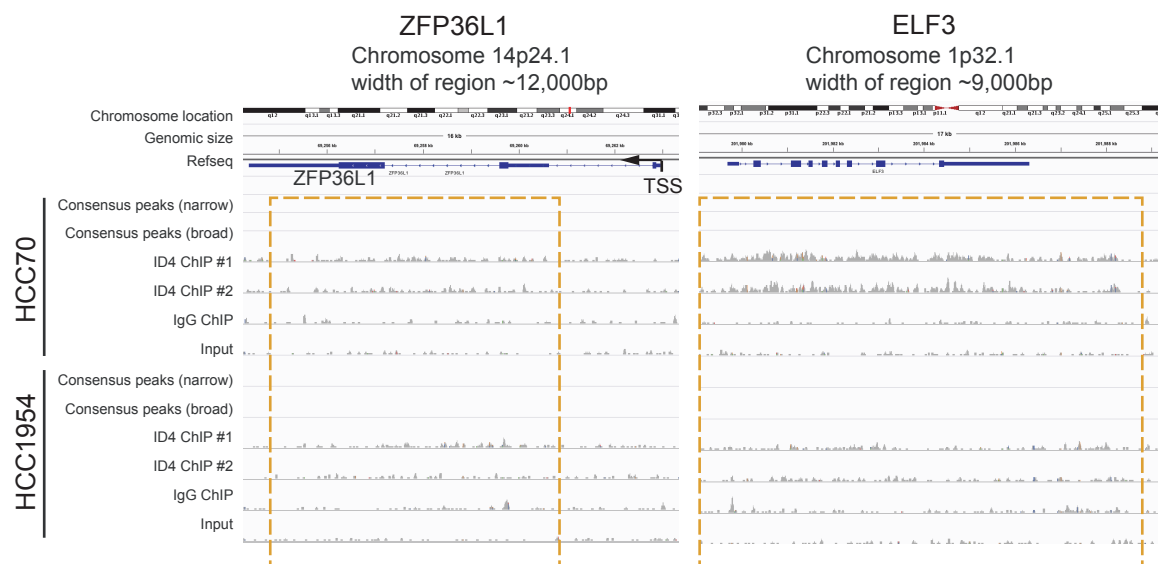

Supplementary Figure 3 cont.

d

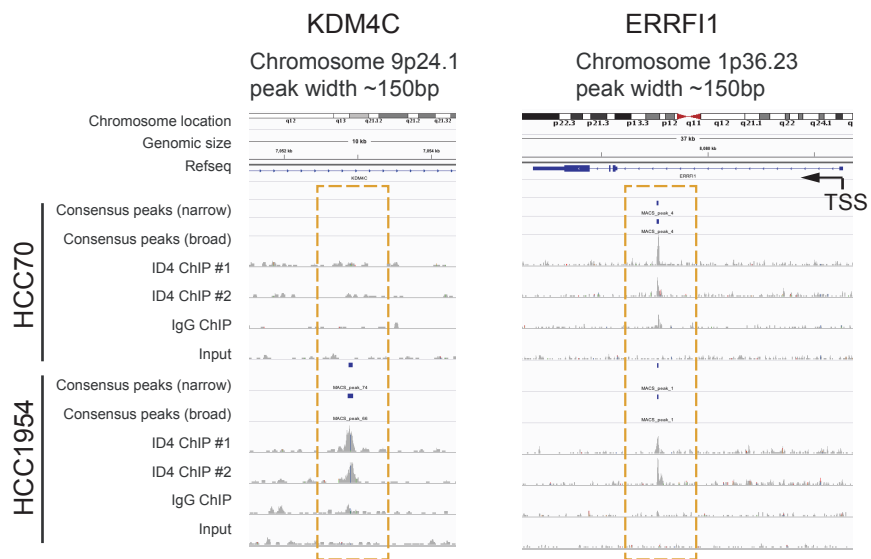

# Supplementary Figure 4

a

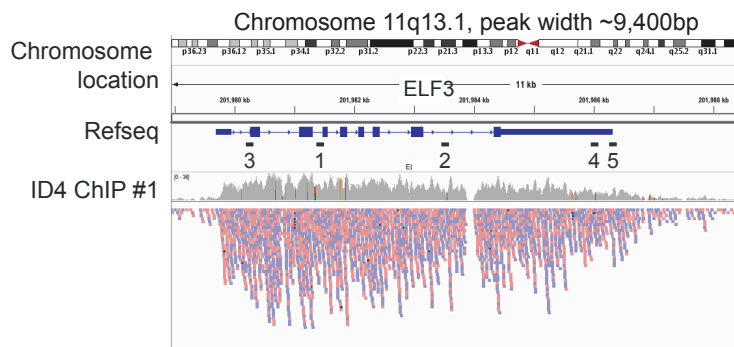

b

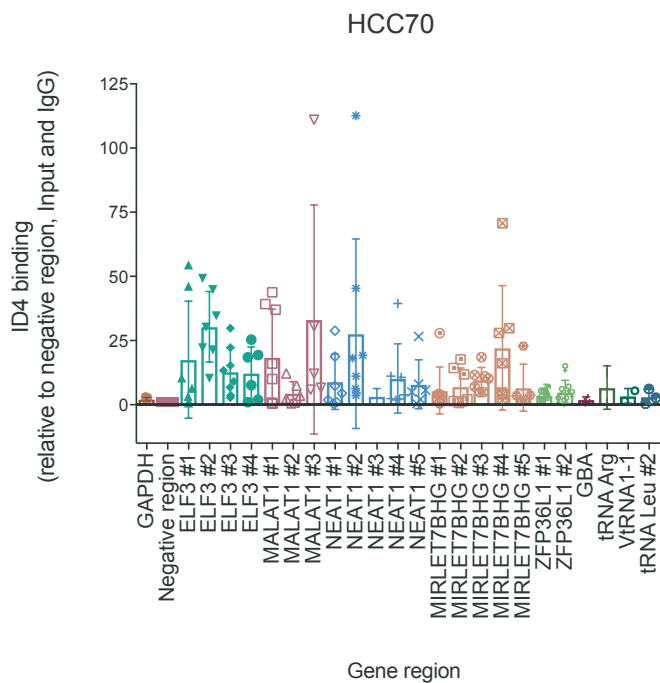

c

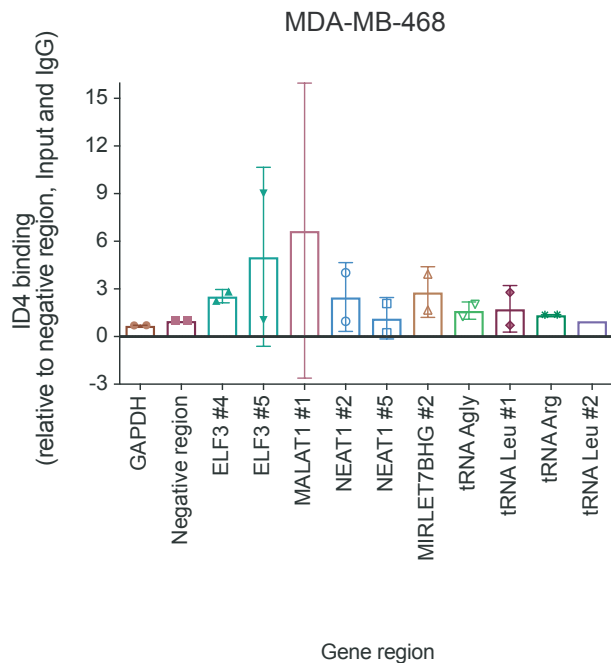

d

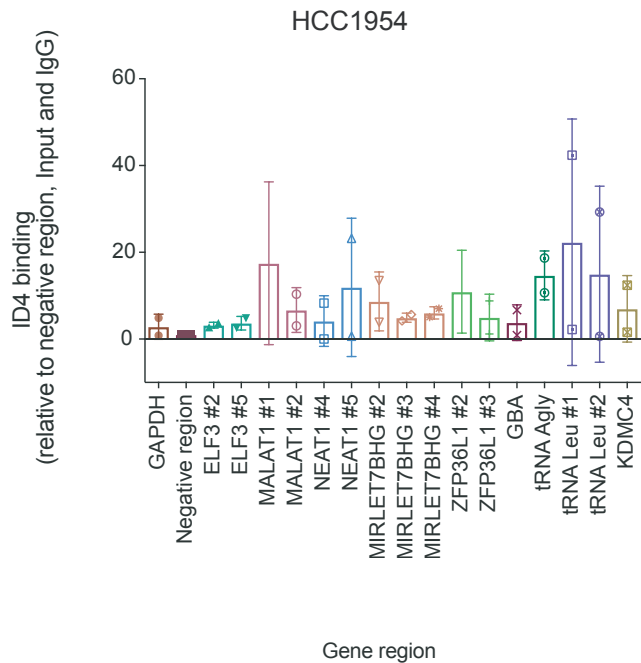

Supplementary Figure 5

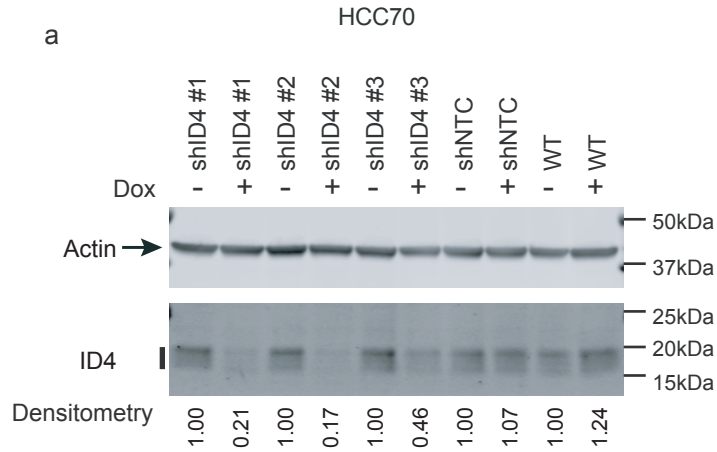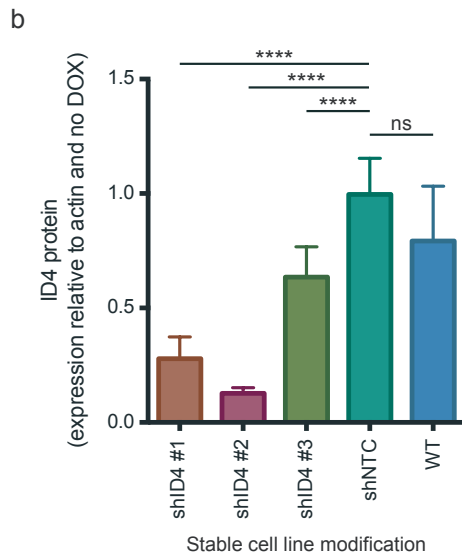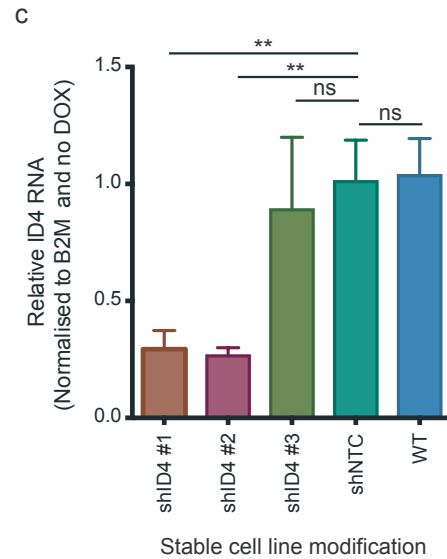

# Supplementary Figure 6

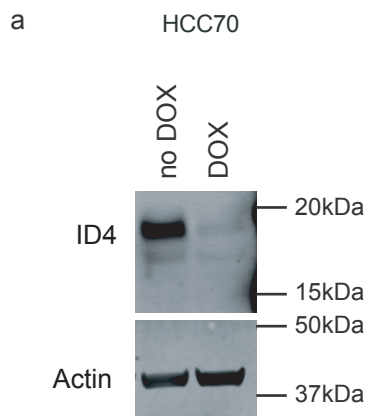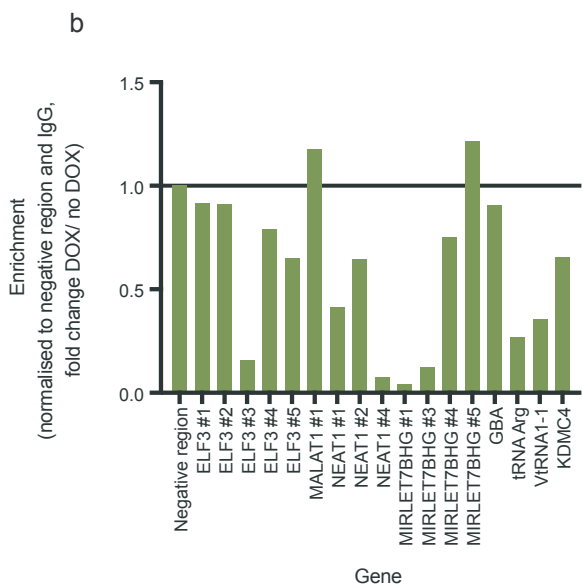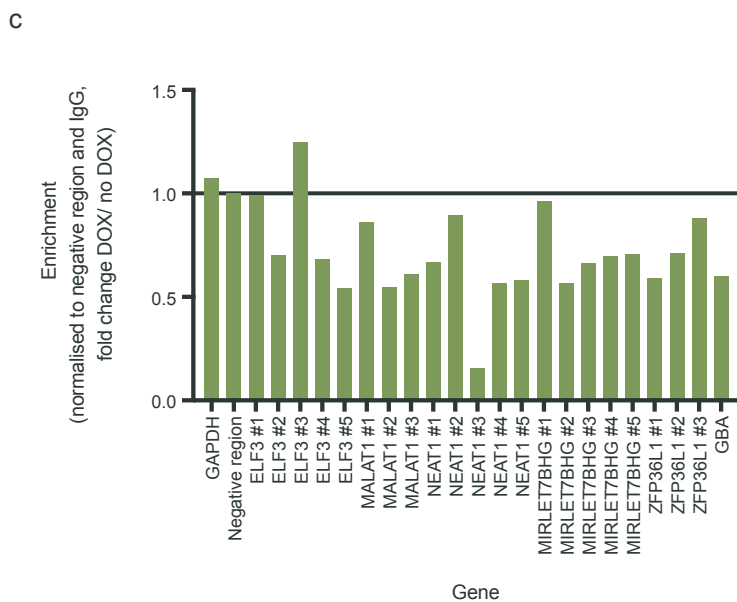

# Supplementary Figure 7

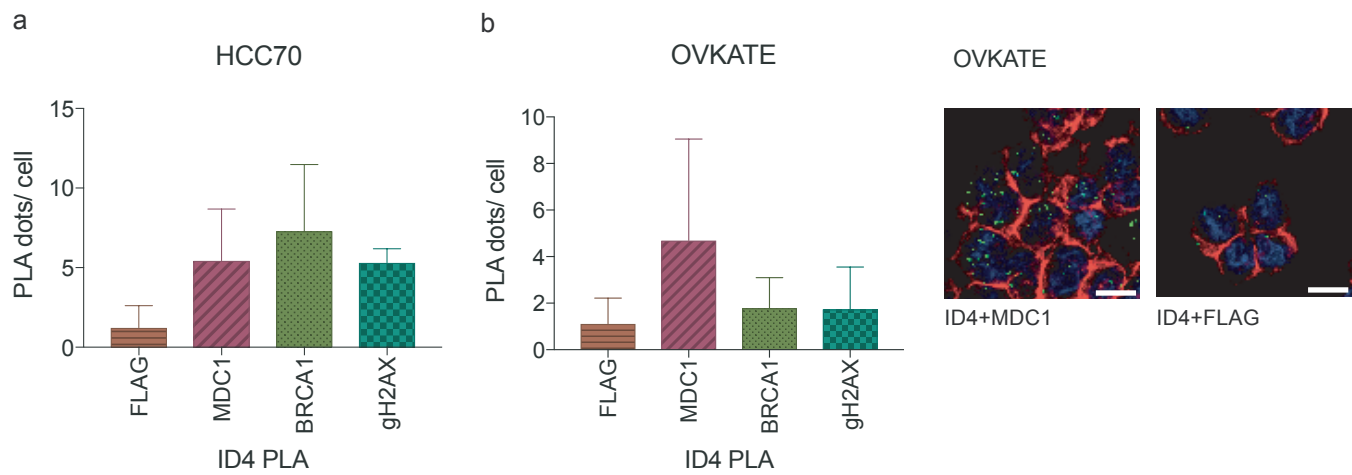



# Supplementary Figure 8

a

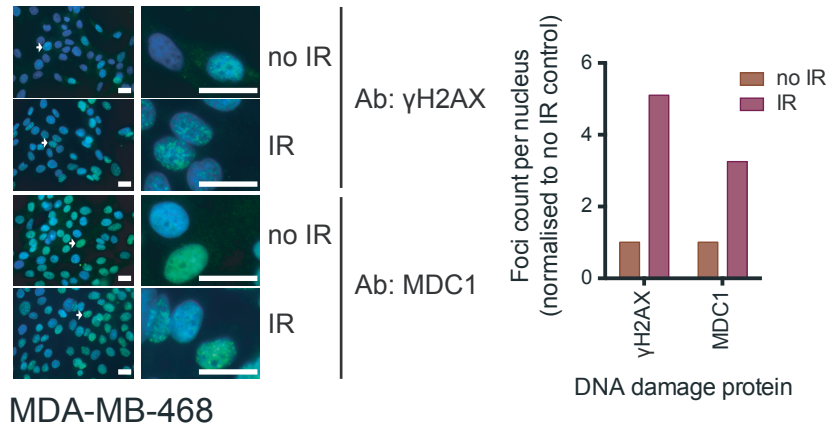

MDA-MB-468

b

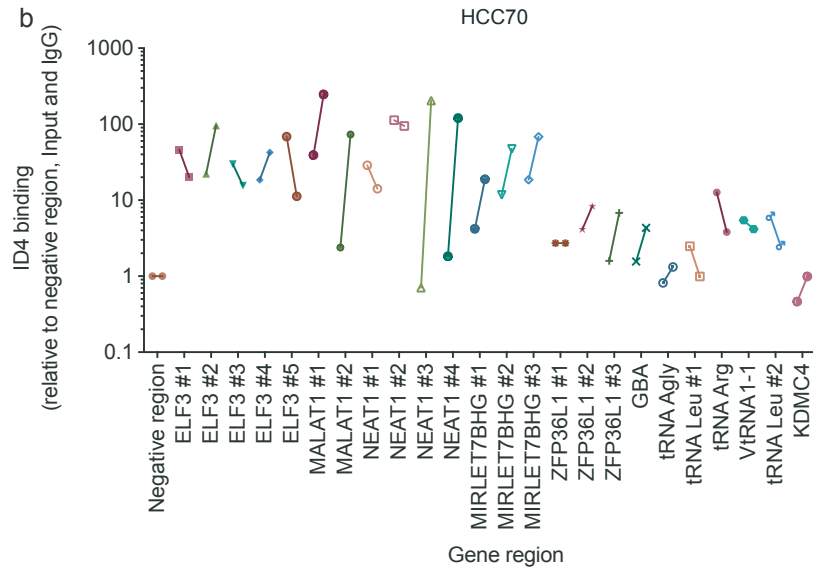

c

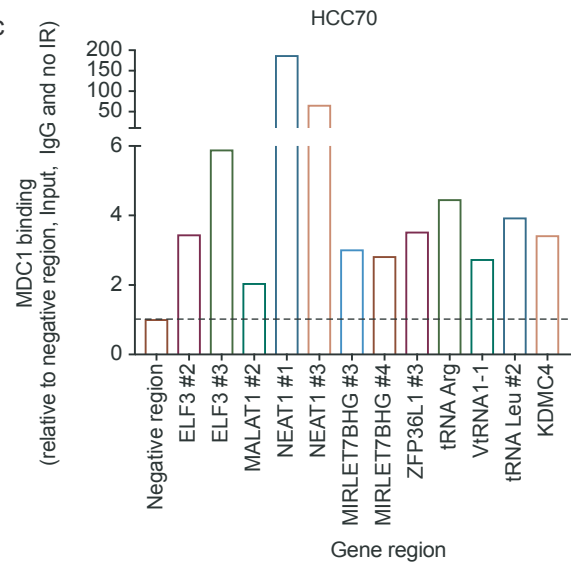

# Supplementary Figure 9

a

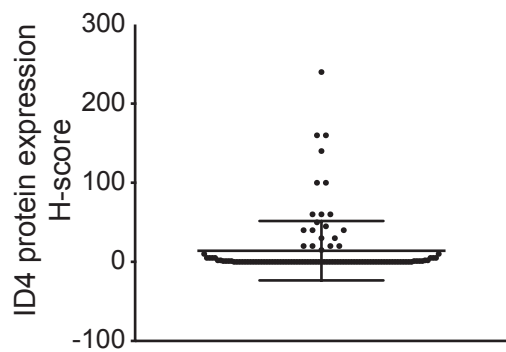

b

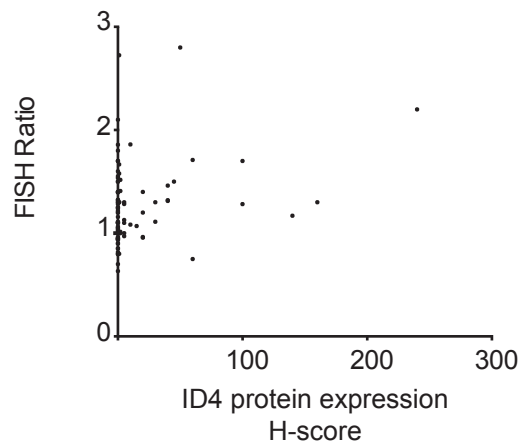

Supplement: 13058_2020_1306_MOESM1_ESM.pdf [file 13058_2020_1306_MOESM1_ESM.pdf]
